# Supplementary material
Source: HighWire-hosted journal article supplement (https://gut.bmj.com/content/70/1/222)
Supplement: inline-supplementary-material-4 [file inline-supplementary-material-4.pdf]

## Primary antibody information

| Gene symbol | Name                                         | Cat. #    | Predicted size | Source (Animal)     | Company                                |
|-------------|----------------------------------------------|-----------|----------------|---------------------|----------------------------------------|
| DDX4 (VASA) | DEAD (Asp Glu Ala Asp) box polypeptide       | ab13840   | 76kDa          | Rabbit (polyclonal) | Abcam                                  |
| DAZL        | DAZ like autosomal                           | ab34139   | 33kDa          | Rabbit (polyclonal) | Abcam                                  |
| SCP3/SYCP3  | Synaptonemal complex protein 3               | NB300-232 | 28kDa          | Rabbit (polyclonal) | Novus Biologicals                      |
| SOX9        | SRY (sex-determining region Y)-box 9 protein | AB5535    | 65kDa          | Rabbit (polyclonal) | Merck Millipore                        |
| TNP1(TP1)   | Transition protein-1                         | ab73135   |                | Rabbit (polyclonal) | Abcam                                  |
| Bax         | BCL2-Associated X                            | bs-4564R  | 21kd           | Rabbit (polyclonal) | Beijing Biosynthesis Biotechnology CO. |
| P53         | Transformation related protein 53            | bs-8687R  | 53kd           | Rabbit (polyclonal) | Beijing Biosynthesis Biotechnology CO. |
| HSP90       | Heat shock 90 kDa protein                    | bs-3292R  | 42kd           | Rabbit (polyclonal) | Beijing Biosynthesis Biotechnology CO. |
| PGK2        | Phosphoglycerate kinase 2                    | D121803   | 45kd           | Rabbit (polyclonal) | Sangon Biotech (Shanghai) Co., Ltd.    |
| Acrosin     | Anti-Acrosin antibody                        | Ab-203289 | 46kDa          | Rabbit              | Abcam                                  |
| GPX1        | Glutathione peroxidase 1                     | bs-3882R  | 22kDa          | Rabbit (polyclonal) | Beijing Biosynthesis Biotechnology CO. |
| actin       | actin                                        | Ab3280    | 42kDa          | Rabbit (polyclonal) | Abcam                                  |
