# Supplementary material
Source: HighWire-hosted journal article supplement (https://gut.bmj.com/content/70/1/222)
Supplement: inline-supplementary-material-7 [file inline-supplementary-material-7.xlsx]

## Sheet: Sheet1
	The relative abundance of bateria in small intestinal digesta (%) FMT2-5 W
	Taxonomy	Phylum	Class	Order	Family	Genus
	A10-FMT	Firmicutes 71.77	Bacilli 61.29	Lactobacillales 61.21	Lactobacillaceae 60.93	Lactobacillus 60.93
		Bacteroidetes 19.03	Bacteroidia 19.03	Bacteroidales 19.03	Porphyromonadaceae 19.03	Barnesiella 8.15
		Proteobacteria 8.04	Erysipelotrichia 7.58	Erysipelotrichales 7.58	Erysipelotrichaceae 7.58	Allobaculum 6.65
			Deltaproteobacteria 7.23	Desulfovibrionales 7.22	Desulfovibrionaceae 7.22	Desulfovibrio 7.22
			Clostridia 2.88	Clostridiales 2.88	Clostridiaceae 1.13
					Lachnospiraceae 1.38
	A100-FMT	Firmicutes 67.79	Bacilli 50.94	Lactobacillales 50.87	Lactobacillaceae 50.85	Lactobacillus 50.85
		Bacteroidetes 11.93	Bacteroidia 11.93	Bacteroidales 11.93	Porphyromonadaceae 11.88	Barnesiella 4.44
		Proteobacteria 17.93	Erysipelotrichia 11.60	Erysipelotrichales 11.60	Erysipelotrichaceae 11.60	Allobaculum 10.02
			Deltaproteobacteria 17.70	Desulfovibrionales 17.67	Desulfovibrionaceae 17.67	Desulfovibrio 17.67
			Clostridia 5.24	Clostridiales 5.24	Clostridiaceae 1.46
					Lachnospiraceae 3.35
	Con-FMT	Firmicutes 72.12	Bacilli 47.67	Lactobacillales 47.42	Lactobacillaceae 47.36	Lactobacillus 47.36
		Bacteroidetes 20.84	Bacteroidia 20.84	Bacteroidales 20.84	Porphyromonadaceae 20.82	Barnesiella 9.68
		Proteobacteria 5.48	Erysipelotrichia 17.56	Erysipelotrichales 17.56	Erysipelotrichaceae 17.56	Allobaculum 17.22
			Deltaproteobacteria 4.68	Desulfovibrionales 4.68	Desulfovibrionaceae 4.68	Desulfovibrio 4.68
			Clostridia 6.88	Clostridiales 6.88	Clostridiaceae 2.53
					Lachnospiraceae 4.15
	Sa	Firmicutes 86.74	Bacilli 75.25	Lactobacillales 75.19	Lactobacillaceae 75.15	Lactobacillus 75.15
		Bacteroidetes 6.56	Bacteroidia 6.56	Bacteroidales 6.56	Porphyromonadaceae 6.54	Barnesiella 2.24
		Proteobacteria 5.54	Erysipelotrichia 8.34	Erysipelotrichales 8.34	Erysipelotrichaceae 8.34	Allobaculum 3.57
			Deltaproteobacteria 5.32	Desulfovibrionales 5.31	Desulfovibrionaceae 5.31	Desulfovibrio 5.31
			Clostridia 3.15	Clostridiales 3.15	Clostridiaceae 1.29
					Lachnospiraceae 1.56
	Control	Firmicutes 77.54	Bacilli 67.42	Lactobacillales 67.22	Lactobacillaceae 66.92	Lactobacillus 66.92
		Bacteroidetes 7.93	Bacteroidia 7.92	Bacteroidales 7.92	Porphyromonadaceae 7.90	Barnesiella 2.92
		Proteobacteria 12.99	Deltaproteobacteria 12.42	Desulfovibrionales12.42	Desulfovibrionaceae 12.42	Desulfovibrio 12.42
			Clostridia 9.75	Clostridiales 9.75	Clostridiaceae 8.14
					Lachnospiraceae 1.34
