# Supplementary material
Source: HighWire-hosted journal article supplement (https://gut.bmj.com/content/70/1/222)
Supplement: inline-supplementary-material-11 [file inline-supplementary-material-11.xlsx]

## Sheet: Sheet1
	Figure 5h: Y-axis (blood metabolites)													Figure 5h: X-axis (microbiot)
	From up to down													From right to left
	PC(18:2(2E,4E)/0:0)												10	Desulfovibrionales
	Cholesterol sulfate												9	Bifidobacteriales
	Glycitein 4'-O-glucuronide												8	Burkholderiales
	6-[5-(5,7-dihydroxy-4-oxo-3,4-dihydro-2H-1-benzopyran-2-yl)-2-hydroxyphenoxy]-3,4,5-trihydroxyoxane-2-carboxylic acid												7	Bacteroidales
	L-phenylalanyl-L-hydroxyproline												6	Coriobacteriales
	15-deoxy-delta-12,14-PGJ2-d4												5	Erysipelotrichales
	Pantothenic Acid												4	Lactobacillales
	Xanthotoxol glucoside												3	Bacillales
	PC(18:2(9Z,12Z)/0:0)			positive									2	Clostridiales
	PC(17:2(9Z,12Z)/0:0)												1	Mycoplasmatales
	LysoPC(18:2(9Z,12Z))
	Polysorbate 20
	Lathosterol
	octatriacontanoic acid								positive
	7-Acetoxy-6-hydroxylimonin
	(alpha-keto-dimethyl-delta-N,N-Dimethylguanidynol) valeric acid
	PC(0:0/20:4(5Z,8Z,11Z,14Z))
	PC(16:1(9Z)/20:2(11Z,14Z))
	PC(16:0/20:3(5Z,8Z,11Z))
	LysoPC(20:1(11Z))
	PC(16:0/0:0)[U] / PC(16:0/0:0)[rac]
	Amoritin
	PC(0:0/16:0)
	LysoPE(18:0/0:0)
	PC(19:1(9Z)/0:0)
	PE(0:0/22:1(13Z))
	Glycerophosphocholine
	Aminoadipic acid
	Aspartyl-Cysteine
	PC(20:3(5Z,8Z,11Z)/0:0)
	2-[3-(sulfooxy)phenyl]acetic acid
	PC(18:1(11Z)/0:0)
	D-Galactose	Increased in Control vs. Sa
	PC(9:0/9:0)	Decreased in Sa vs. A10-FMT
	PC(17:1(10Z)/0:0)
	LysoPC(16:1(9Z)/0:0)
	LysoPE(20:1(11Z)/0:0)
	Lactosylceramide (d18:1/12:0)
	Ovalicin
	PA(20:4(5Z,8Z,11Z,14Z)/24:1(15Z))
	PA(20:4(8Z,11Z,14Z,17Z)/24:1(15Z))
	Cinereain
	PC(16:0/3:0)
	PC(20:3(8Z,11Z,14Z)/16:0)
	PA(20:5(5Z,8Z,11Z,14Z,17Z)/24:0)
	PC(20:3(8Z,11Z,14Z)/18:1(9Z))
	17-hydroxy stearic acid
	3-Indole carboxylic acid glucuronide
	PC(18:0/2:0)
