# Supplementary material
Source: HighWire-hosted journal article supplement (https://gut.bmj.com/content/70/1/222)
Supplement: inline-supplementary-material-15 [file inline-supplementary-material-15.xlsx]

## Sheet: Sheet1
	Metabolites (from up to down)
1	Aminomalonic acid
2	Bovinocidin
3	Gossypetin 8-glucuronide 3-sulfate
4	Choline
5	PE(22:4(7Z,10Z,13Z,16Z)/0:0)
6	8-Hydroxypurine
7	Adenosine
8	L-alpha-Amino-5-oxo-2(5H)-isoxazolepropanoic acid
9	PE(16:1(9Z)/P-18:0)
10	Indole
11	4S-aminopentanoic acid
12	12,13-DiHOME
13	Palmitic acid(d3)
14	PS(20:3(8Z,11Z,14Z)/21:0)
15	Triacetin
16	PC(16:0/20:3(8Z,11Z,14Z))
17	PS(15:0/22:0)
18	12,13-DHOME
19	Succinylacetone
20	4R-aminopentanoic acid
21	Margaric acid(d3)
22	9-tridecynoic acid
23	2,6-Dimethylphenol
24	2-Octenyl butyrate
25	5-amino-pentanoic acid
26	L-Histidinol
27	1,4-beta-D-Glucan
28	1-Isothiocyanato-7-(methylsulfinyl)heptane
29	Dopaquinone
30	Eremopetasitenin B2
31	Fucose 1-phosphate
32	Guanosine
33	Haloperidol glucuronide
34	Beta-Citryl-L-glutamic acid
35	MG(16:0/0:0/0:0)[rac]
36	LysoPC(22:5(4Z,7Z,10Z,13Z,16Z))
37	gamma-Glutamylglutamic acid
38	Thymidine glycol
39	LysoPC(22:5(7Z,10Z,13Z,16Z,19Z))
40	Glucose 1-phosphate
41	PC(22:5(7Z,10Z,13Z,16Z,19Z)/0:0)
42	PS(16:0/0:0)
43	(2S,3'S)-alpha-Amino-2-carboxy-5-oxo-1-pyrrolidinebutanoic acid
44	Palmitoyl Ethanolamide
45	PG(16:0/0:0)[U]
46	LysoPC(22:1(13Z))
47	PHHdiA-PE
48	PE(O-16:0/0:0)
49	Hildgardtene
50	1-Palmitoylglycerophosphoinositol
51	LysoPC(22:6(4Z,7Z,10Z,13Z,16Z,19Z))
52	1-hexadecanoyl-sn--glycero-3-phospho-D-myo-inositol
53	N-Acetylaspartylglutamic acid
54	PC(22:6(4Z,7Z,10Z,13Z,16Z,19Z)/0:0)
55	LysoPE(0:0/18:3(6Z,9Z,12Z))
56	LysoPC(20:3(5Z,8Z,11Z))
57	LysoPC(20:3(8Z,11Z,14Z))
58	PS(20:2(11Z,14Z)/0:0)
59	LysoPC(20:4(5Z,8Z,11Z,14Z))
60	2-Linoleoyl Glycerol
61	3-hexenedioic acid
62	PE(P-18:0/0:0)
63	Villosin
64	2-Hydroxycinnamic acid
65	Propanal
66	Isovaleric acid
67	L-Carnitine
68	(S)-a-Amino-2,5-dihydro-5-oxo-4-isoxazolepropanoic acid N2-glucoside
69	LysoPE(20:1(11Z)/0:0)
70	LysoPE(16:1(9Z)/0:0)
71	LysoPE(18:1(11Z)/0:0)
72	PE(18:1(9Z)/0:0)
73	LysoPE(0:0/18:1(11Z))
74	LysoPE(22:4(7Z,10Z,13Z,16Z)/0:0)
75	LysoPC(17:0)
76	3R-HETE
77	2-Stearoylglycerophosphoinositol
78	LysoPE(0:0/20:4(8Z,11Z,14Z,17Z))
79	PE(20:4(5Z,8Z,11Z,14Z)/0:0)
80	Sphingosine
81	PS(22:6(4Z,7Z,10Z,13Z,16Z,19Z)/0:0)
82	O-Arachidonoyl Glycidol
83	OHOHA-PA
84	PI(20:4(5Z,8Z,11Z,14Z)/0:0)
85	N-Desmethylritonavir
86	Allodesmosine
87	Japanic acid
88	11b,21-Dihydroxy-5b-pregnane-3,20-dione
89	LysoPC(18:0)
90	1-Oleoylglycerophosphoserine
91	Wyeronic acid
92	LysoPE(0:0/18:2(9Z,12Z))
93	Lathosterol
94	LysoPE(20:2(11Z,14Z)/0:0)
95	LysoPC(P-18:0)
96	Cholesterol
97	Visnagin
98	(-)-Cladielline
99	LysoPE(0:0/22:4(7Z,10Z,13Z,16Z))
100	LysoSM(d18:1)
101	LysoPE(18:0/0:0)
102	PE(18:2(9Z,12Z)/0:0)
103	OKOHA-PA
104	1-Arachidonoylglycerophosphoinositol
105	1-Oleoylglycerophosphoinositol
106	PE(O-18:1(9Z)/0:0)
107	2-amino-4-({1-[(carboxymethyl)-C-hydroxycarbonimidoyl]-2-[(2-{3,5-dihydroxy-4-[(1E)-3-methylbut-1-en-1-yl]phenyl}-2-hydroxy-1-(4-hydroxyphenyl)ethyl)sulfanyl]ethyl}-C-hydroxycarbonimidoyl)butanoic acid
108	PE(18:0/0:0)
109	23,24-didehydro-25-hydroxyvitamin D3 / 23,24-didehydro-25-hydroxycholecalciferol
110	LysoPE(0:0/20:3(11Z,14Z,17Z))
111	Oxamniquine
112	4-hydroxy-8cis-sphingenine
113	LysoPC(20:1(11Z))
114	PI(18:1(9Z)/0:0)
115	Cer(d16:1/17:0)
116	Cervonyl carnitine
117	Procyanidin B3
118	Adrenic Acid
119	Calcidiol
120	S-Japonin
121	27-Deoxy-5b-cyprinol
122	PE(0:0/20:3(8Z,11Z,14Z))
123	23-Acetoxysoladulcidine
124	LysoPE(0:0/20:3(5Z,8Z,11Z))
125	PS(18:1(9Z)/0:0)
126	PA(22:2(13Z,16Z)/0:0)
127	3-hydroxyoctadecanoylcarnitine
128	7-dehydrocholesterol
129	PI(14:0/0:0)
130	Ganoderal A
131	S-Furanopetasitin
132	Arachidyl carnitine
133	N-[(4E,8E)-1,3-dihydroxyoctadeca-4,8-dien-2-yl]hexadecanamide
134	Cer(t18:0/16:0)
135	LysoPE(20:5(5Z,8Z,11Z,14Z,17Z)/0:0)
136	Eicosapentaenoic acid
	T-DPA
